# Supplementary material for: Broadband near-infrared luminescence in a cubic pyrophosphate Al0.5Ta0.5P2O7:Cr3+ phosphor for multi-functional applications
Source: Royal Society of Chemistry journal article supplement (doi:10.1039/d3dt04211a), 2024-01-01
Supplement: d3dt04211a1.pdf [file d3dt04211a1.pdf]

## Support information

### Broadband near-infrared luminescence in cubic pyrophosphate

### $\text{Al}_{0.5}\text{Ta}_{0.5}\text{P}_2\text{O}_7$ : $\text{Cr}^{3+}$ phosphor for multi-functional applications

Long Chen<sup>a</sup>, Jiyou Zhong<sup>a,\*</sup>, Jiajun Wu<sup>a</sup> and Weiren Zhao<sup>a,b\*</sup>

<sup>a</sup>School of Physics and Optoelectronic Engineering, Guangdong University of Technology, Guangzhou 510006, China. E-mail: [zhongjiyou@126.com](mailto:zhongjiyou@126.com); [zwren123@126.com](mailto:zwren123@126.com).

<sup>b</sup>Guangdong Provincial Key Laboratory of Information Photonics Technology, Guangdong University of Technology Guangzhou, 510006, China.

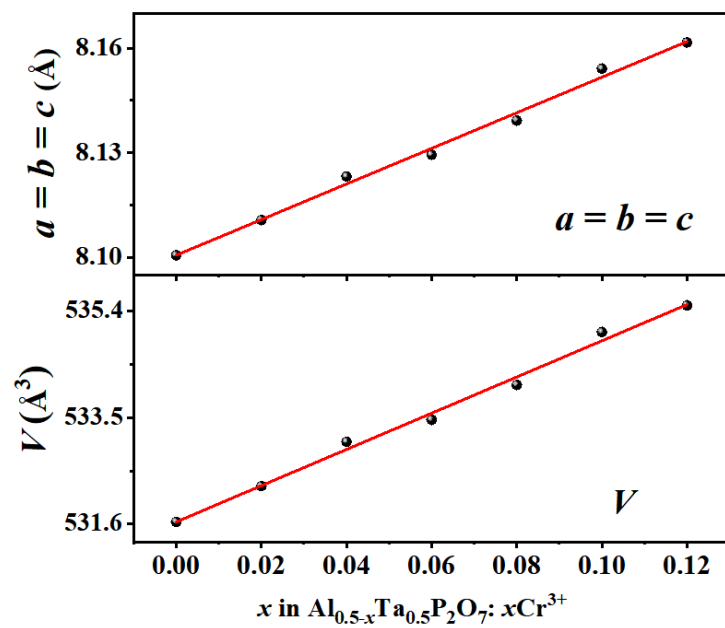

**Fig. S1** The refined lattice parameters as a function of  $\text{Cr}^{3+}$  concentration.

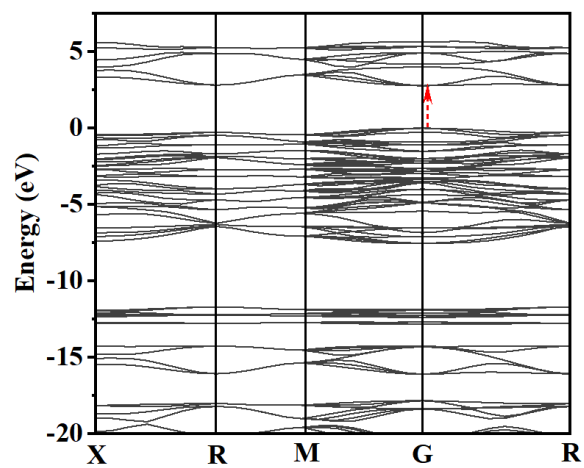

**Fig. S2** DFT-calculated electronic band structure of  $\text{Al}_{0.5}\text{Ta}_{0.5}\text{P}_2\text{O}_7$ .

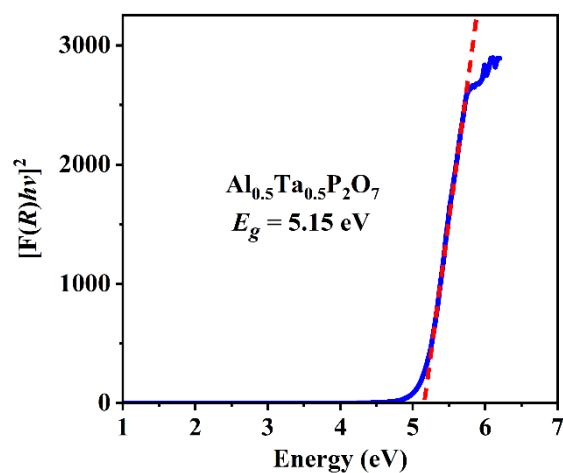

**Fig. S3** The optical band gap ( $E_g$ ) calculated based on Kubelka-Munk equation.

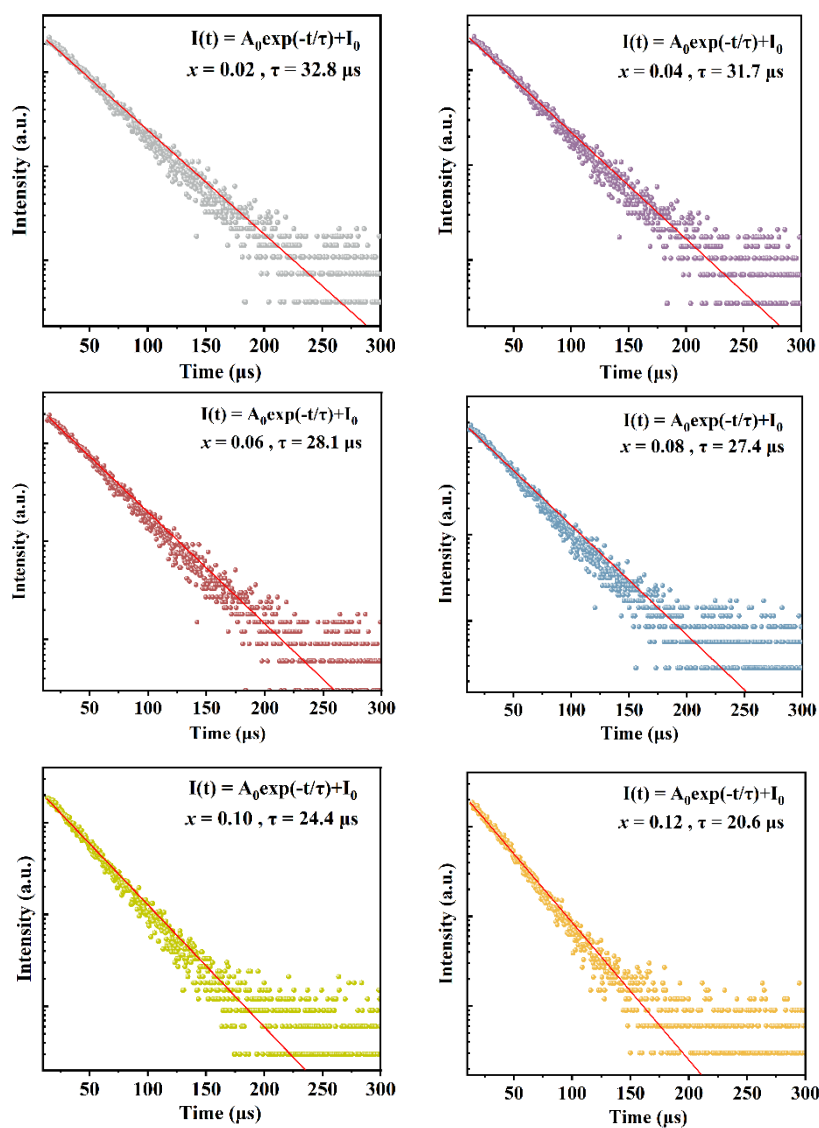

**Fig. S4** Decay curves and the fitted lifetimes of  $\text{Al}_{0.5-x}\text{Ta}_{0.5}\text{P}_2\text{O}_7: x\text{Cr}^{3+}$  ( $x = 0.02, 0.04, 0.06, 0.08, 0.10,$  and  $0.12$ ) phosphors.

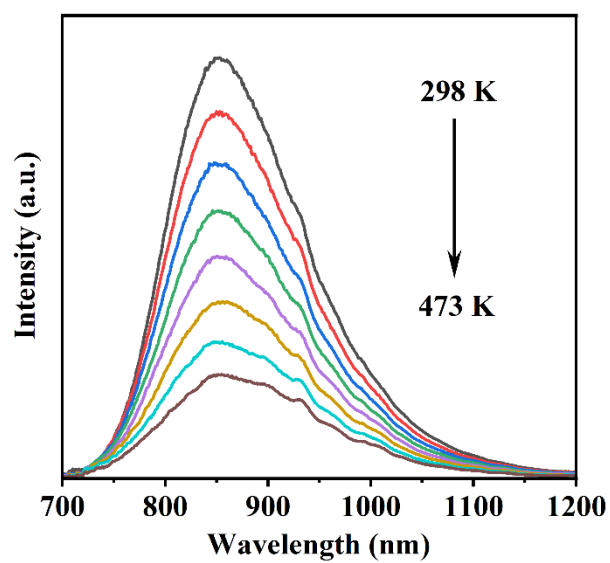

**Fig. S5** Temperature-dependent PL spectra of  $\text{Al}_{0.44}\text{Ta}_{0.5}\text{P}_2\text{O}_7: 0.06\text{Cr}^{3+}$ .

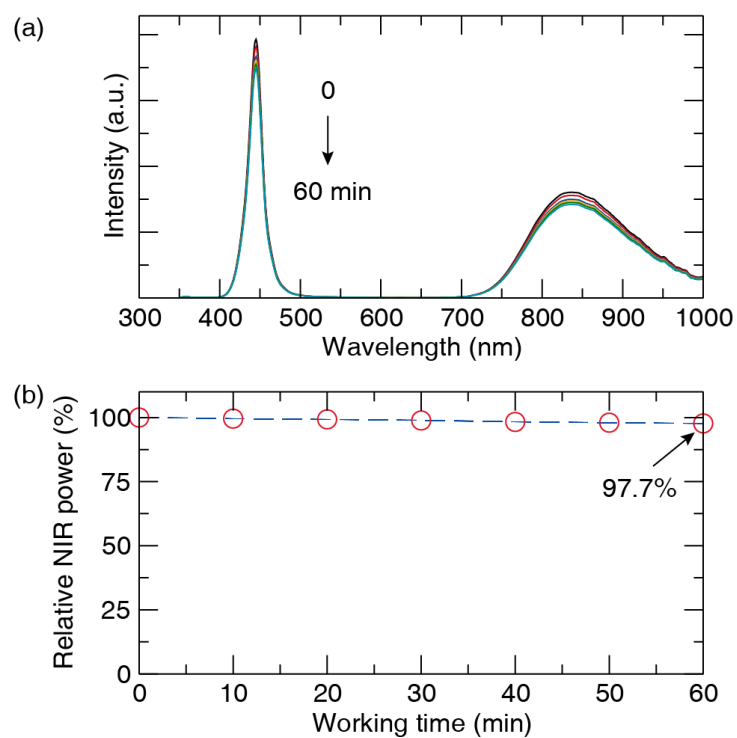

**Fig. S6** (a) Time-dependent EL spectra of NIR pc-LED device under 100 mA driving current. (b) Relative NIR output power as a function of working time.

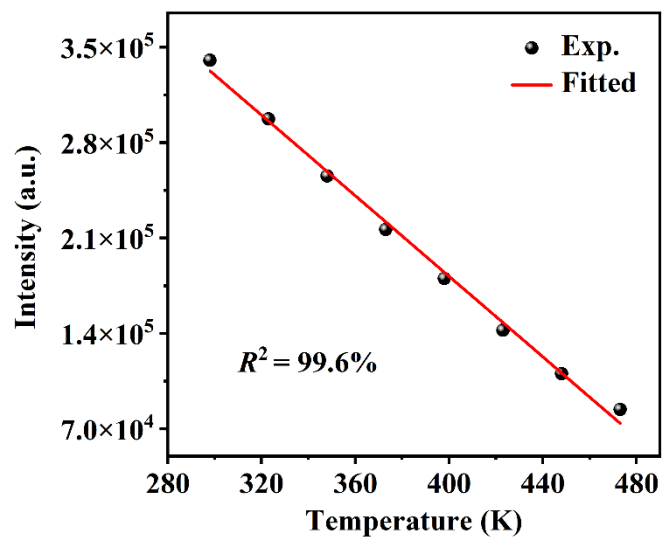

**Fig. S7** Linearly fitting the relationship between emission intensity and temperature.

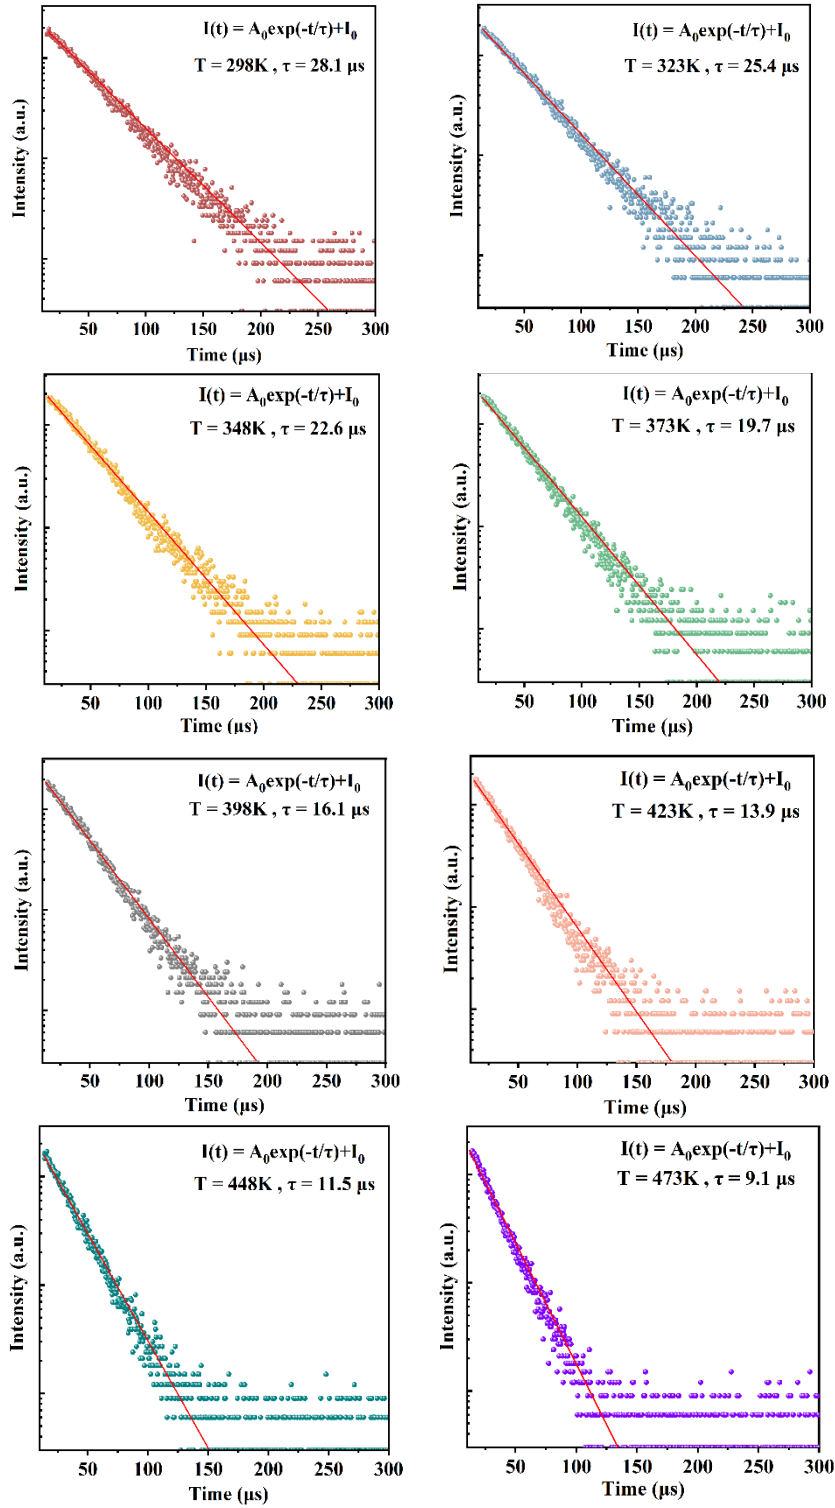

**Fig. S8** Decay curves and the fitted lifetimes of  $\text{Al}_{0.44}\text{Ta}_{0.5}\text{P}_2\text{O}_7: 0.06\text{Cr}^{3+}$  phosphors in temperature range of 298 – 473 K.

**Table S1.** The refined atomic positions of  $\text{Al}_{0.5}\text{Ta}_{0.5}\text{P}_2\text{O}_7$ .

| Atom  | Site | $x$    | $y$    | $z$    | Occ. | Ueq    |
|-------|------|--------|--------|--------|------|--------|
| Al(1) | 4b   | 0.5000 | 0.5000 | 0.5000 | 0.5  | 0.0068 |
| Ta(1) | 4b   | 0.5000 | 0.5000 | 0.5000 | 0.5  | 0.0053 |
| P(1)  | 8c   | 0.1054 | 0.1054 | 0.1054 | 1    | 0.0051 |
| O(1)  | 24d  | 0.0550 | 0.2733 | 0.0760 | 1    | 0.0097 |
| O(2)  | 4a   | 0      | 0      | 0      | 1    | 0.0105 |

**Table S2.** The detailed parameters of NIR output power, NIR photoelectric conversion efficiency, and LED input power under different driven currents.

| Current<br>(mA) | LED input power<br>(mW) | NIR output power<br>(mW) | NIR photoelectric<br>conversion efficiency<br>(%) |
|-----------------|-------------------------|--------------------------|---------------------------------------------------|
| 25              | 67.61                   | 2.983                    | 4.919                                             |
| 50              | 139.7                   | 5.613                    | 4.345                                             |
| 75              | 215.5                   | 7.849                    | 3.833                                             |
| 100             | 294.8                   | 9.705                    | 3.403                                             |
| 125             | 377.5                   | 11.17                    | 2.963                                             |
| 150             | 463.4                   | 12.25                    | 2.67                                              |
| 175             | 552.8                   | 13.02                    | 2.329                                             |
| 200             | 645.3                   | 13.31                    | 2.065                                             |
